# Supplementary material for: Influence of support acidity on the performance of size-confined Pt nanoparticles in the chemoselective hydrogenation of acetophenone
Source: Royal Society of Chemistry journal article supplement (doi:10.1039/c5cy00214a), 2015-01-01
Supplement: c5cy00214a1.pdf [file c5cy00214a1.pdf]

# Supporting Information

## **Influence of support acidity on the performance of size-confined Pt nanoparticles in the chemoselective hydrogenation of the model aromatic ketone acetophenone**

Zichun Wang,<sup>a</sup> Kyung-Duk Kim,<sup>a</sup> Cuifeng Zhou,<sup>a</sup> Mengmeng Chen,<sup>a</sup> Nobutaka Maeda,<sup>b</sup>  
Zongwen Liu,<sup>a</sup> Jeffrey Shi,<sup>a</sup> Alfons Baiker,<sup>b</sup> Michael Hunger,<sup>c</sup> and Jun Huang<sup>\*,a</sup>

† Laboratory for Catalysis Engineering, School of Chemical and Biomolecular Engineering, The University of Sydney, NSW 2006, Australia

‡ Institute for Chemical and Bioengineering, Department of Chemistry and Applied Bioscience, ETH Zürich, HCI, CH-8093 Zürich, Switzerland

§ Institute of Chemical Technology, University of Stuttgart, D-70550 Stuttgart, Germany

*Small angle XRD patterns*

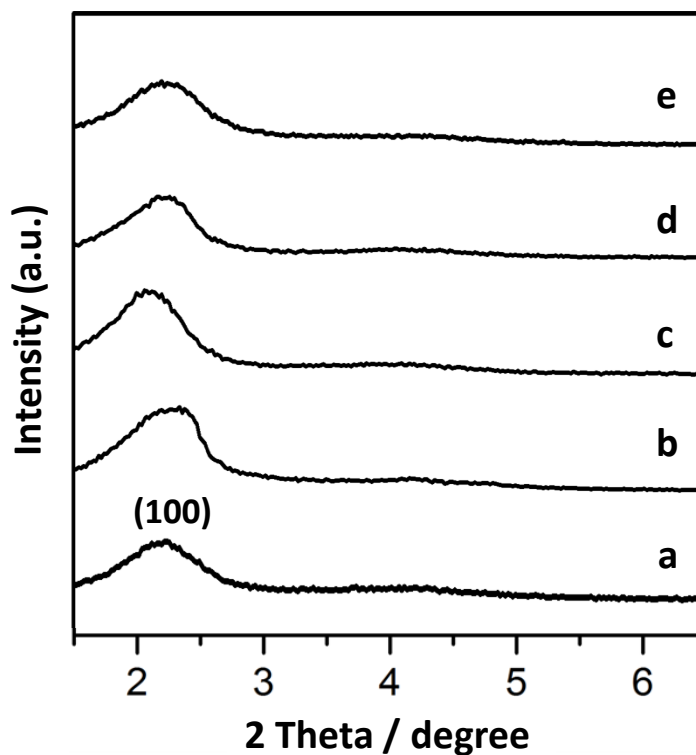

**Figure S1.** Small-angle XRD patterns of (a) Pt/[Al]MCM-41/50, (b) Pt/[Al]MCM-41/40, (c) Pt/[Al]MCM-41/30, (d) Pt/[Al]MCM-41/20, and (e) Pt/[Al]MCM-41/10.

XRD patterns recorded in the small-angle region ( $2\theta = 1.5^\circ - 7^\circ$ ) of the Pt/MCM-41 materials with different Si/Al ratios are shown in Fig. S1. The broadening of the  $d(100)$  reflection at  $2.3^\circ$  for decreasing Si/Al ratios of the Pt/[Al]MCM-41 materials, indicates a distortion of the long-range order of the hexagonal structure of the support materials, and is a consequence of the aluminum incorporation into the silica framework.<sup>1,2</sup> However, the incorporation of aluminum did not distort the essentially mesoporous structure of the supports.<sup>3,4</sup>

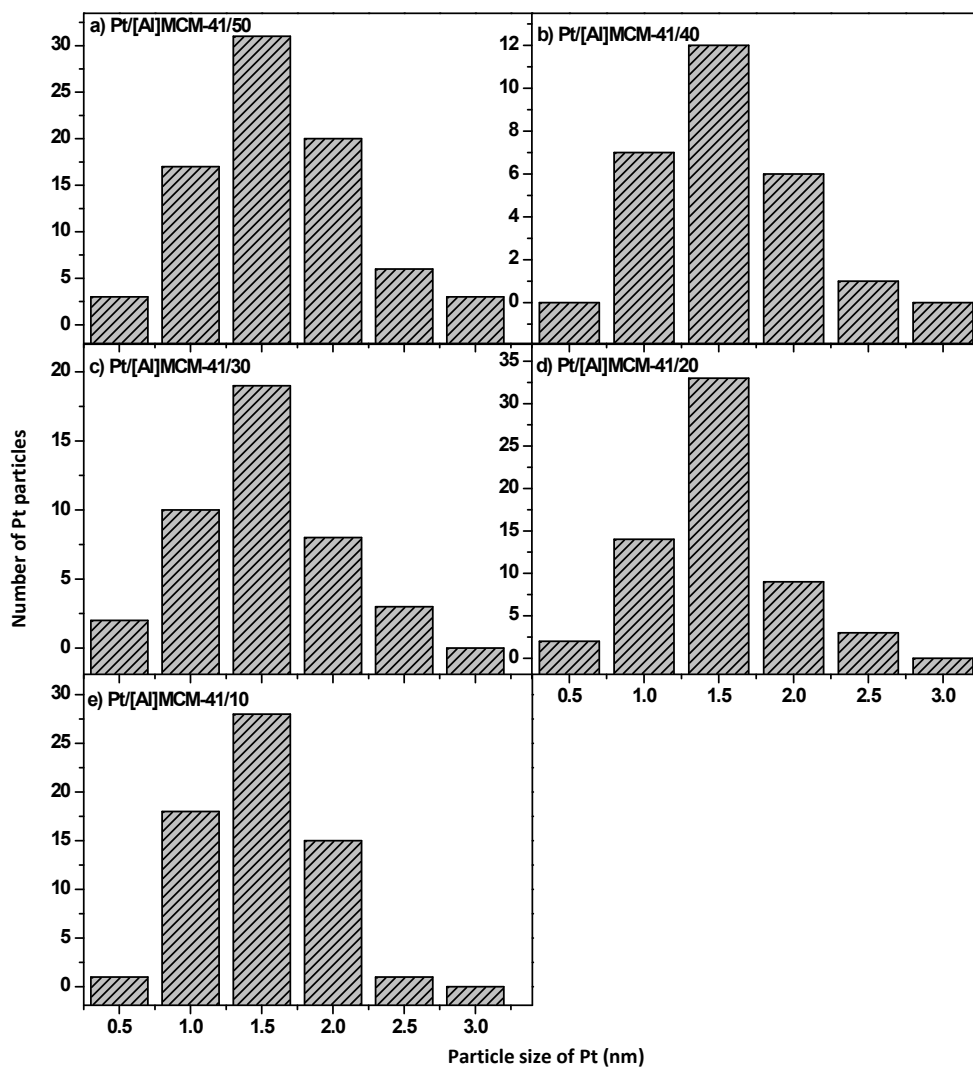

**Figure S2.** Pt particle size distribution (histograms) of (a) Pt/[Al]MCM-41/50, (b) Pt/[Al]MCM-41/40, (c) Pt/[Al]MCM-41/30, (d) Pt/[Al]MCM-41/20, and (e) Pt/[Al]MCM-41/10.

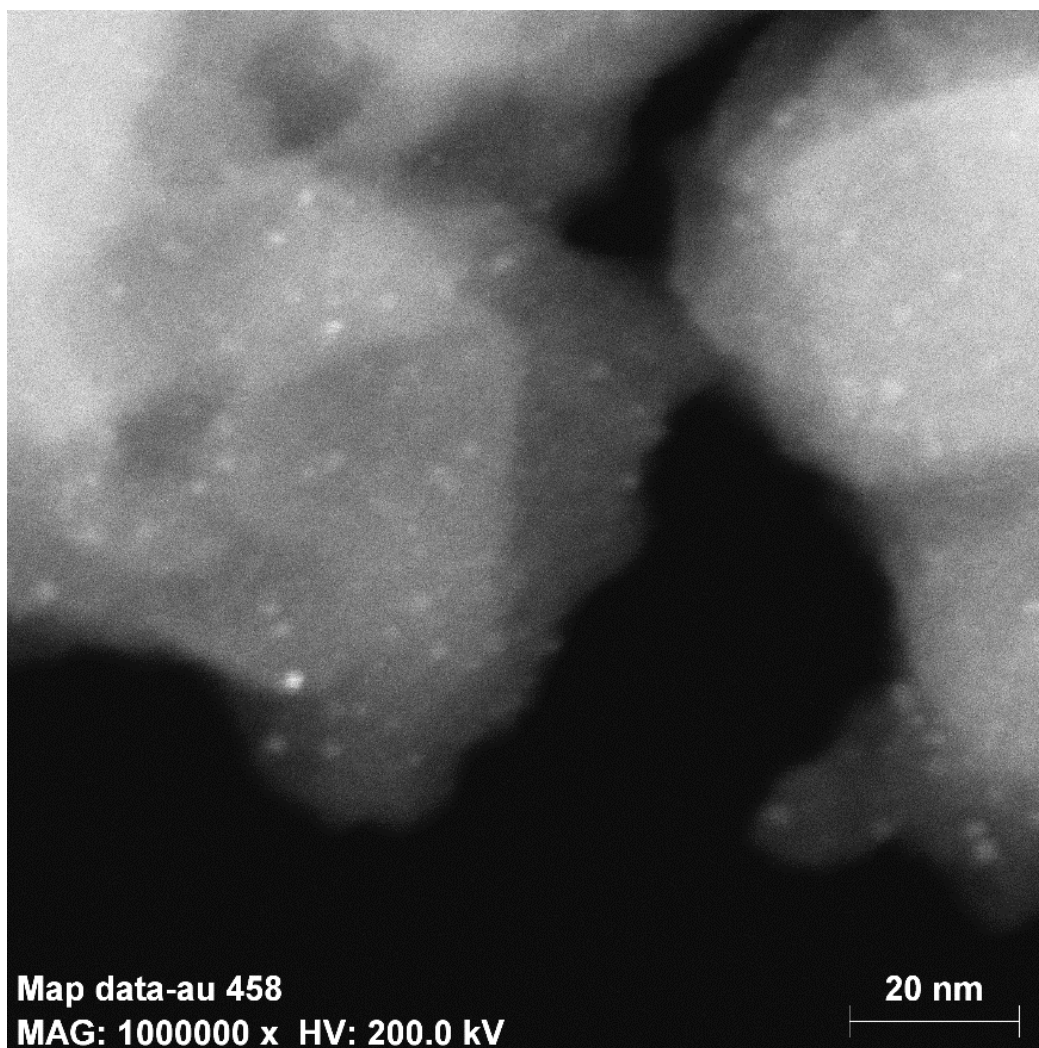

**Figure S3.** STEM image of Pt/[Al]MCM-41/10.

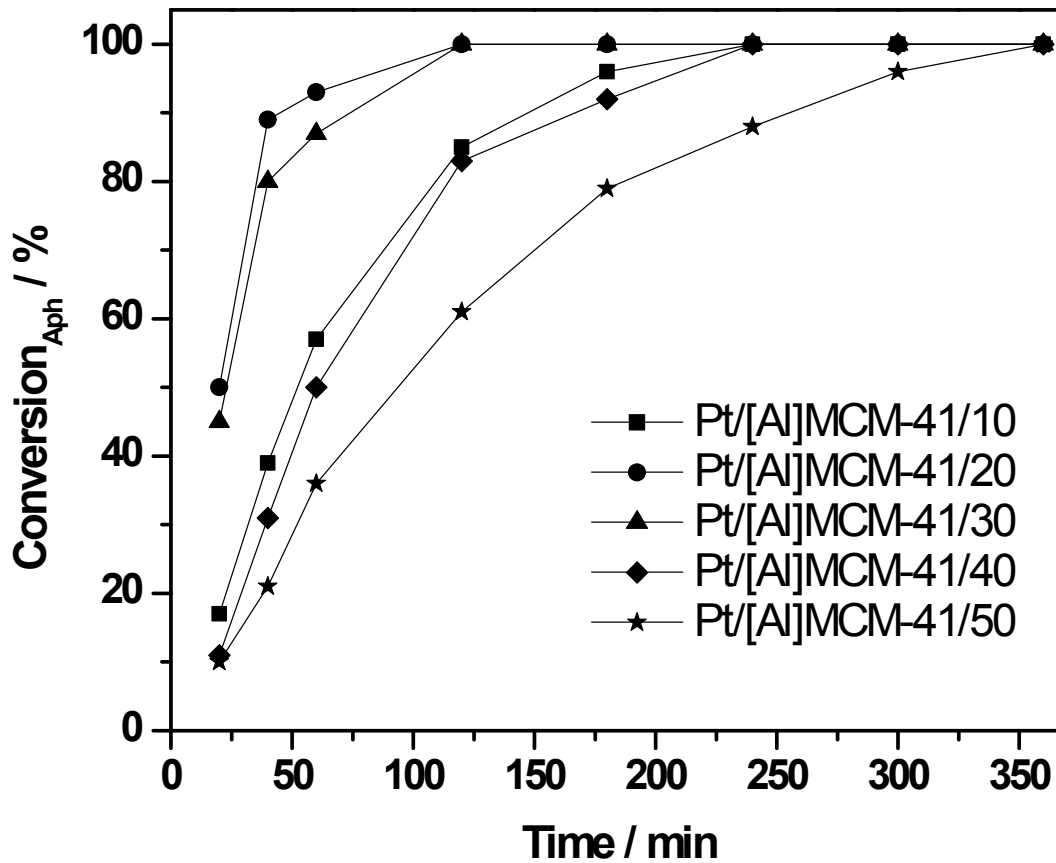

**Figure S4.** Catalytic conversion of APh over Pt/[Al]MCM-41 with Si/Al ratio of 50 (★), 40 (◆), 30 (▲), 20 (●), and 10 (■). Conditions: APh (60 mg) in hexane (6 ml) solution, 20 mg Pt/[Al]MCM-41 catalyst added, 1 bar H<sub>2</sub>, room temperature, 360 min reaction time.

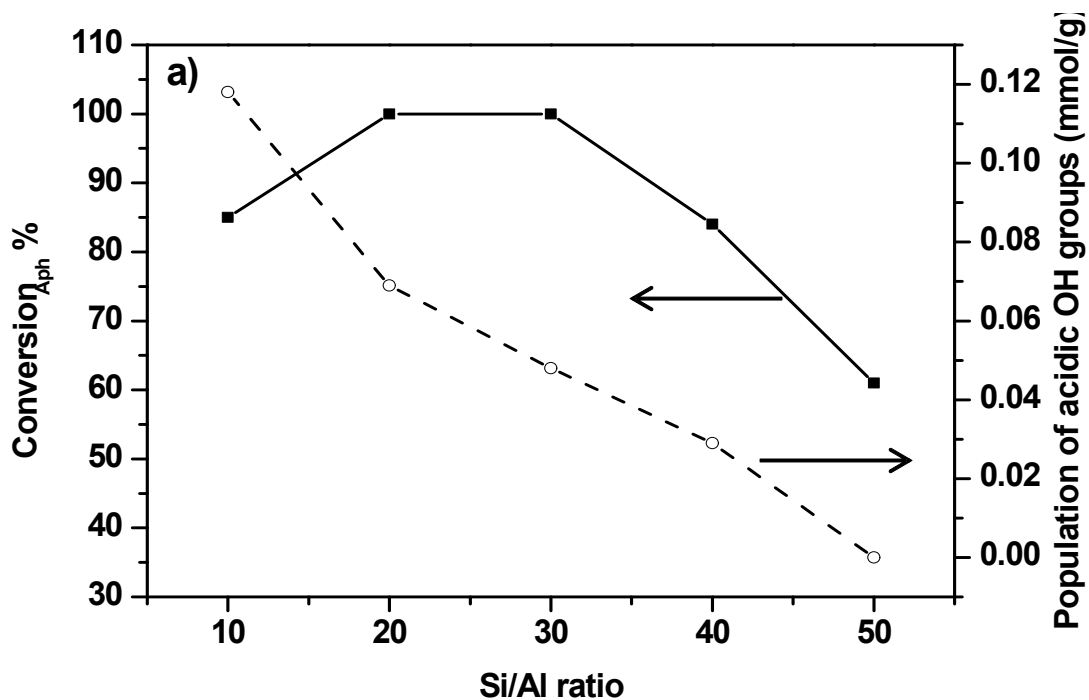

**Figure S5.** Aph conversion determined after a reaction time of 2 h (■) and population density of surface acid sites (○) as a function of Si/Al ratios of Pt/[Al]MCM-41 catalysts under study.

The Aph conversion determined after a reaction time of 2 h increased from 61 to 100 % when the population of acidic OH groups increased from 0 to  $39.9 \times 10^{-3}$  BAS/nm<sup>2</sup>. Further increase of the population of acidic OH groups to  $70.4 \times 10^{-3}$  BAS/nm<sup>2</sup> to a decrease of Aph conversion to 85 %. The observed behaviour is similar to that observed after 20 min Aph conversion shown in Fig. 6a. A possible reason for this behaviour is discussed in Section 3.4 in the manuscript.

***Estimation of the Weisz–Prater criterion and its verification on the mass transfer behavior over Pt/[Al]MCM-41 catalysts***

In order to check whether the catalytic results were influenced by intraparticle mass transfer, we applied the Weisz-Prater (W–P) criterion.<sup>5</sup>

$$\varphi_{W-P} = \frac{r_a \times R_p^2}{C_s \times D_{eff}} \quad \text{Eq. 1}$$

where  $r_a$  is the initial global reaction rate,  $R_p$  is the catalyst particle radius,  $C_s$  is the substrate concentration on the catalyst surface, and  $D_{eff}$  is the effective diffusivity of the reactants in the pores.

Based on the method by Wilke and Chang,<sup>6</sup> the diffusivity of a dilute H<sub>2</sub> gas solute in a hexane or acetophenone (Aph) solvent is calculated according to:

$$D_{1,2} = 1.1728 \times 10^{-16} \frac{T \sqrt{\chi M_2}}{\eta_2 V_1^{0.6}} \quad \text{Eq. 2}$$

where  $T$  is the reaction temperature (293 K),  $\chi$  is the solvent association parameter that has been taken as 1 due to the non- or weak polarity of hexane and Aph,  $M_2$  is the molecular weight of solvent,  $\eta_2$  is the viscosity of the solvent at the reaction temperature (ca.  $3.07 \times 10^{-4}$  Pa·s for hexane and  $9.3 \times 10^{-4}$  Pa·s for Aph), and  $V_1$  is the molar volume of the gas solute at the normal boiling point ( $0.0286 \text{ m}^3/\text{kmol}$ ). The diffusivities of H<sub>2</sub> in hexane and Aph are estimated to be  $0.77 \times 10^{-5} \text{ cm}^2/\text{s}$  and  $0.3 \times 10^{-5} \text{ cm}^2/\text{s}$ , respectively.

The diffusivity of H<sub>2</sub> in the mixture is estimated using Eq. 3:

$$D_{H_2, \text{mixt}} = \frac{(D_{H_2, \text{hexane}} \eta_{\text{hexane}}^{0.5})^{x_{\text{hexane}}} (D_{H_2, \text{Aph}} \eta_{\text{Aph}}^{0.5})^{x_{\text{Aph}}}}{\eta_{\text{mixt}}^{0.5}} \quad \text{Eq. 3}$$

where  $D_{H_2, hexane}$  or  $D_{H_2, Aph}$  represent the diffusivity of hydrogen in hexane and Aph, respectively,  $x_{hexane}$  and  $x_{Aph}$  are the mole fraction of hexane and Aph in the mixture, and  $\eta_{mixt} = \eta_{hexane}^{x_{hexane}} \times \eta_{Aph}^{x_{Aph}}$ .

The diffusivity of H<sub>2</sub> in the mixture is estimated to  $D_{H_2, mixt} = 0.78 \times 10^{-5} \text{ cm}^2/\text{s}$ .

Due to the low mole fraction of Aph in hexane, the diffusivity of Aph in the mixture could be estimated as reported previously<sup>7</sup>, by

$$D_{Aph, mixt} = 4.4 \times 10^{-15} \frac{T}{\eta_{hexane}} \left( \frac{V_{hexane}}{V_{Aph}} \right)^{1/6} \left( \frac{L_{hexane}^{vap}}{L_{Aph}^{vap}} \right)^{1/2} \quad \text{Eq. 4}$$

where  $V_{hexane}$  (0.128 m<sup>3</sup>/kmol) and  $V_{Aph}$  (0.121 m<sup>3</sup>/kmol) are the molar volumes of hexane and acetophenone at the normal boiling point, and  $L_{hexane}^{vap}$  (2.89 × 10<sup>7</sup> J/kmol) and  $L_{Aph}^{vap}$  (4.4 × 10<sup>7</sup> J/kmol) are the enthalpies of vaporization at the normal boiling point. The estimated  $D_{Aph, mixt} = 3.4 \times 10^{-5} \text{ cm}^2/\text{s}$ .

The effective diffusivity of the reactants in the pores of Pt/[Al]MCM-41 ( $D_{eff}$ ) can be calculated applying Eq. 5

$$D_{eff} = D_b \frac{(1 - \lambda)^2}{1 + P\lambda} \quad \text{Eq. 5}$$

where  $\lambda$  is the ratio of the diffusing molecule radius to the average pore radius of the catalyst, and  $P$  is a fitting parameter and estimated as 16.3 here. When  $D_{H_2, mixt}$  and  $D_{Aph, mixt}$  are introduced, the effective diffusivity of the H<sub>2</sub> and Aph can be determined as  $D_{eff/H_2} = 0.33 \times 10^{-5} \text{ cm}^2/\text{s}$  and  $D_{eff/Aph} = 5.1 \times 10^{-9} \text{ cm}^2/\text{s}$ .

The initial global reaction rate  $r_a$  was determined based on kinetic data taken at 10 % Aph conversion using Eq. 6:

$$r_a = \left( \frac{m_{Aph} \times 10\%}{M_{Aph} \times t} \right) \times \left( \frac{m_{cat}}{\rho_{cat}} \right)^{-1} \quad \text{Eq. 6}$$



where  $m_{Aph}$  and  $M_{Aph}$  is the mass of Aph and its molecular weight,  $t$  is the reaction time at 10 % Aph conversion,  $m_{cat}$  and  $\rho_{cat}$  are the mass of the catalyst and its bulk density, respectively. Based on this, the reaction rates  $r_a$  are 4.6  $\mu\text{mol/s}\cdot\text{cm}^3$  for Pt/[Al]MCM-41/50, 5.1  $\mu\text{mol/s}\cdot\text{cm}^3$  for Pt/[Al]MCM-41/40, 18.3  $\mu\text{mol/s}\cdot\text{cm}^3$  for Pt/[Al]MCM-41/30, 22.9  $\mu\text{mol/s}\cdot\text{cm}^3$  for Pt/[Al]MCM-41/20, and 7.6  $\mu\text{mol/s}\cdot\text{cm}^3$  for Pt/[Al]MCM-41/10.

Finally, the Weisz–Prater criterion could be estimated based on the above calculations. Additionally,  $C_s$  for Aph could be estimated according to its mole fraction after 10 % conversion (i.e.  $7.5\times 10^{-5}$  mol/cm<sup>3</sup>) and the surface concentration of H<sub>2</sub> is estimated as  $1.3\times 10^{-4}$  mol/cm<sup>3</sup><sup>8</sup>. The resulting W-P criterion ( $\varphi_{W-P/Aph} = 0.004 \ll 0.3$ , and  $\varphi_{W-P/H_2} = 4.3 \times 10^{-6} \ll 0.3$ ) indicates that the reaction rates were not significantly affected by internal diffusion phenomena.

## References

1. Wu, J. S.; Stebbins, J. F. *J. Non-Cryst. Solids*, 2009, **355**, 556.
2. Xue, X. Y.; Kanzaki, M. *Geochim. Cosmochim. Acta*, 2008, **72**, 2331.
3. Luan, Z.; Cheng, C.-F.; Zhou, W.; Klinowski, J. *J. Phys. Chem.*, 1995, **99**, 1018.
4. Chen, X.; Huang, L.; Ding, G.; Li, Q. *Catal. Lett.*, 1997, **44**, 123.
5. Zhu, J.; Li, M.; Lu, M.; Zhu, J. *Catal. Sci. & Tech.*, 2013, **3**, 737.
6. Wilke, C. R.; Chang, P. *Aiche J.*, 1955, **1**, 264.
7. King, C. J.; Hsueh, L.; Mao, K. W. *J. Chem. and Eng. Data*, 1965, **10**, 348.
8. Katayama, T.; Nitta, T. *J. Chem. & Eng. Data*, 1976, **21**, 194.
